# Supplementary material for: Structural analysis of C8H6˙+ fragment ion from quinoline using ion-mobility spectrometry/mass spectrometry
Source: Royal Society of Chemistry journal article supplement (doi:10.1039/d4cp01676a), 2024-01-01
Supplement: d4cp01676a1.pdf [file d4cp01676a1.pdf]

## Supplementary Information:

Structural analysis of  $C_8H_6^+$  fragment ion from quinoline using ion-mobility spectrometry/mass spectrometry

Kenichi Iwamoto\*<sup>1,2</sup>, Genki Inoue<sup>1</sup>) and Hiroshi Matsubara<sup>1,2</sup>)

1) Department of Chemistry, Graduate School of Science, Osaka Prefecture University, 1-1 Gakuencho Nakaku, Sakai, Osaka 599-8531, Japan

2) Department of Chemistry, Graduate School of Science, Osaka Metropolitan University, 1-1 Gakuencho Nakaku, Sakai, Osaka 599-8531, Japan

\*E-mail:kiwamoto@omu.ac.jp

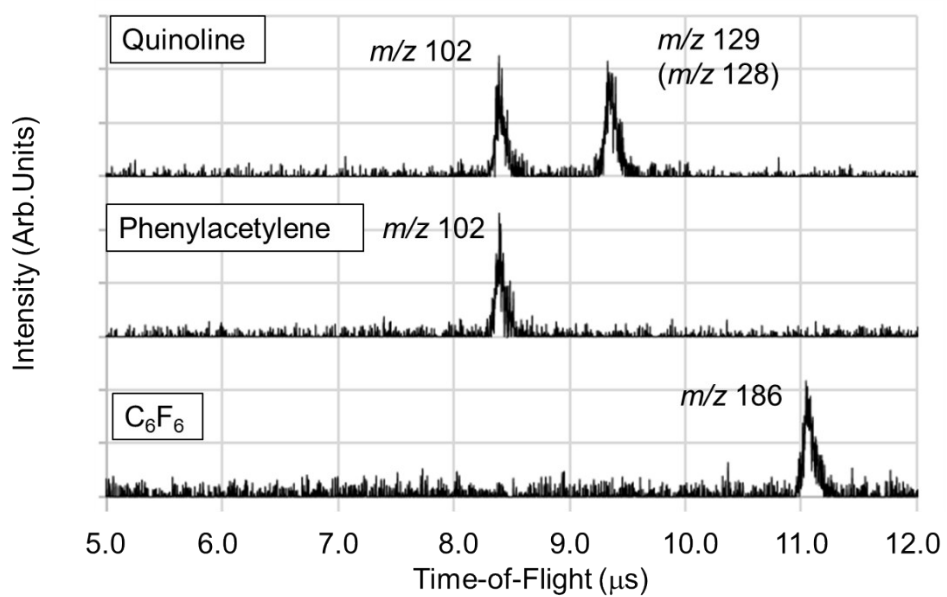

Supplementary Fig. S1: Time-of-Flight (TOF) mass spectrum of quinoline and phenylacetylene and  $\text{C}_6\text{F}_6$ .

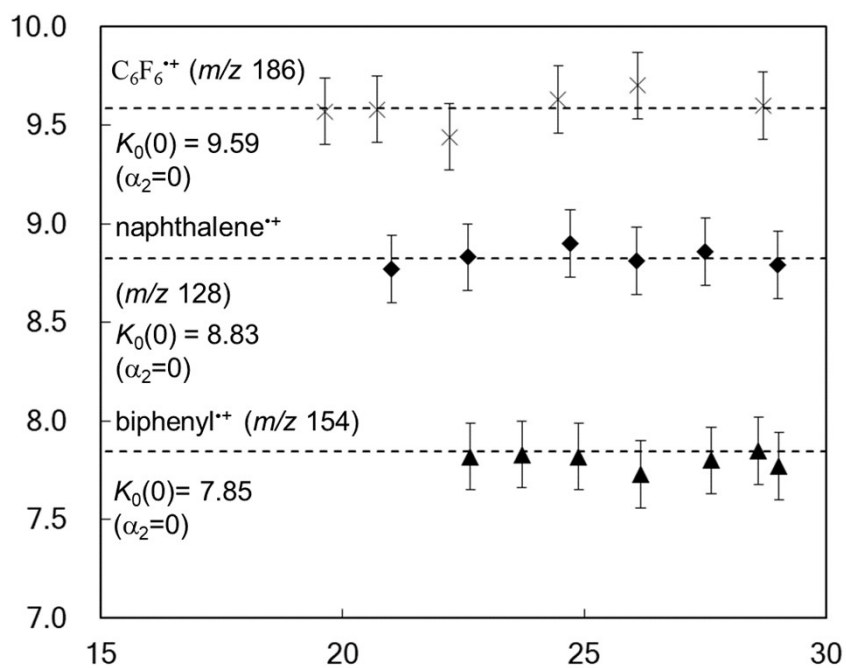

Supplementary Fig. S2: Reduced mobilities  $K_0$  of  $C_6F_6^{+\bullet}$  (cross marks), naphthalene radical cation (closed diamonds), and biphenyl radical cation (closed squares) in the He buffer gas as a function of  $E/N$ .

Supplementary Table S1: Reduced mobilities in He of naphthalene and biphenyl ions

| compound    | $K_0$<br>( $\text{cm}^2\text{V}^{-1}\text{s}^{-1}$ ) | $K_0(0)$<br>( $\text{cm}^2\text{V}^{-1}\text{s}^{-1}$ )<br>this work |
|-------------|------------------------------------------------------|----------------------------------------------------------------------|
| naphthalene | $8.79 \pm 0.07^*$                                    | $8.83 \pm 0.17$                                                      |
| biphenyl    | $7.90 \pm 0.07^*$                                    | $7.85 \pm 0.17$                                                      |

\* Taken from C.S. Creaser *et.al.*, *Anal. Chem.*, **72**, 2724-2729 (2000).
